# Supplementary material for: An oxalamide-bridged imidazole based ‘turn off’ fluorescent receptor for copper(ii) and iron(iii) ions
Source: Royal Society of Chemistry journal article supplement (doi:10.1039/d3nj02444j), 2023-01-01
Supplement: d3nj02444j1.pdf [file d3nj02444j1.pdf]

Supporting Information:

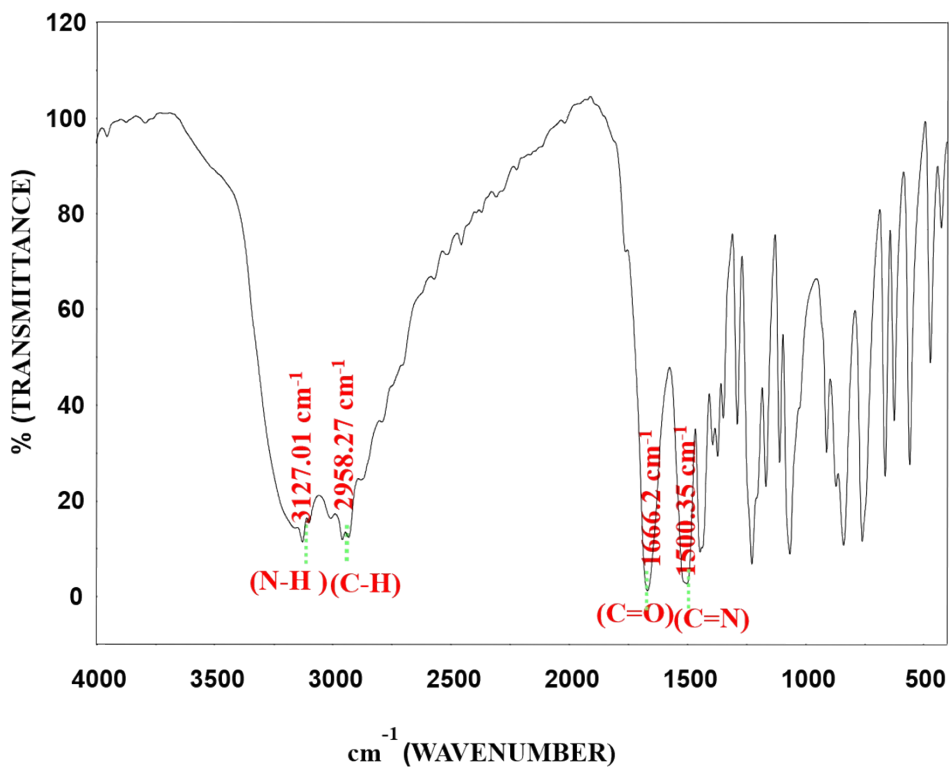

Fig.S1. FT-IR spectrum of OX(PID)<sub>2</sub>

Santhosh-1

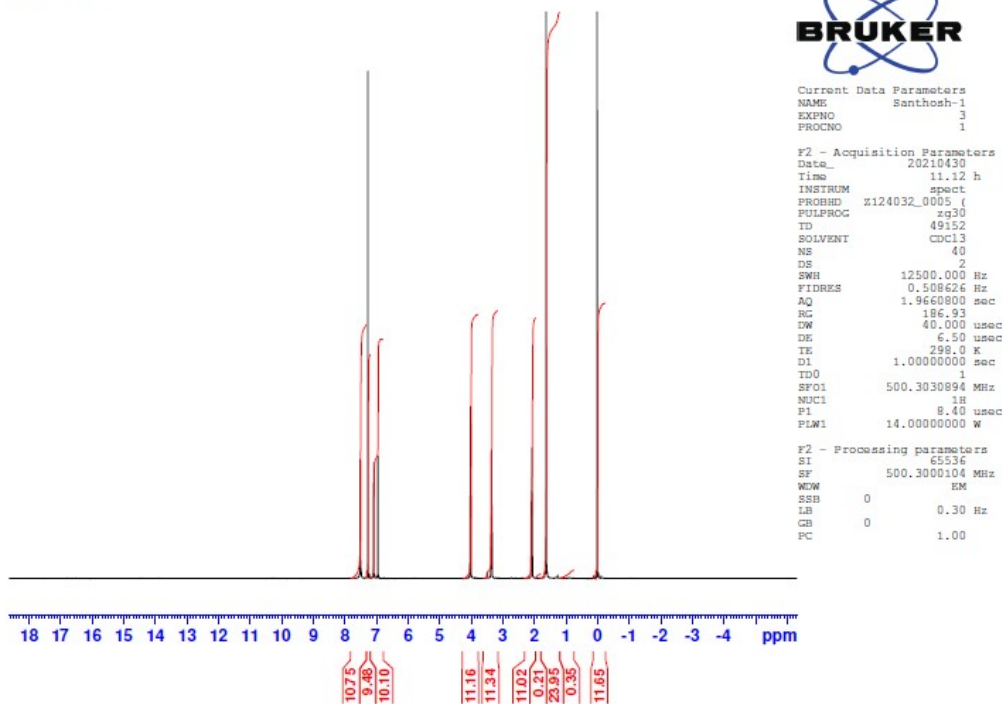

Fig.S2. <sup>1</sup>H NMR spectrum of OX(PID)<sub>2</sub>

C13CPD DMSO {D:\nmrdata\mku\Internal\DrAS} nmr 4

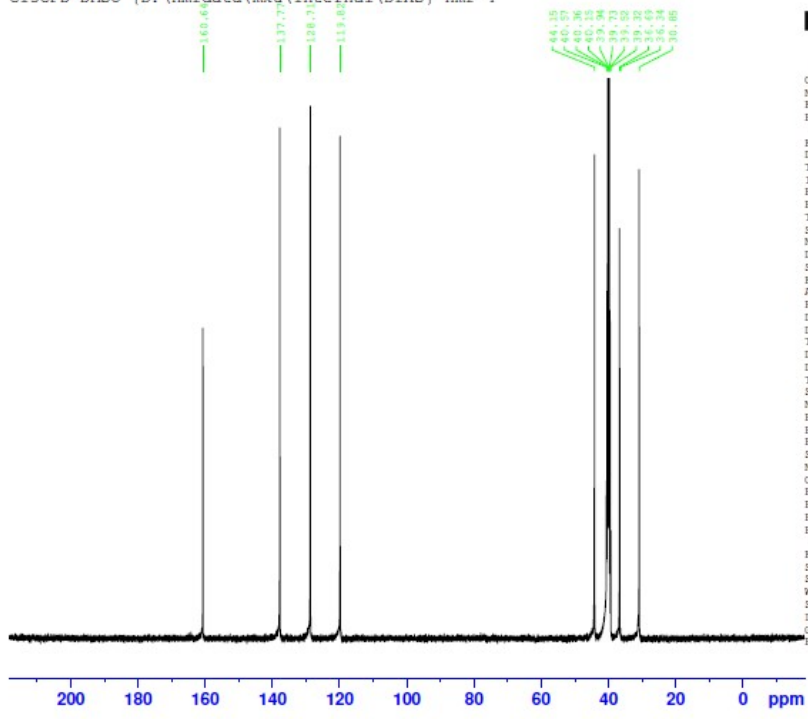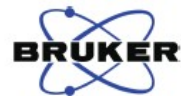

Current Data Parameters  
NAME 13C (X(PID)2  
EXPNO 1  
PROCNO 1

F2 - Acquisition Parameters  
Date\_ 20221114  
Time 14.18 h  
INSTRUM Avance NEO 400MHz  
PROBHD z163739\_0273 1  
PULPROG zgpg30  
TD 65536  
SOLVENT DMSO  
NS 1024  
DS 4  
SWH 23809.523 Hz  
FIDRES 0.726609 Hz  
AQ 1.3762560 sec  
RG 52.0123  
DW 21.000 usec  
DE 6.50 usec  
TE 298.1 K  
D1 2.0000000 sec  
D11 0.0300000 sec  
TD0 1  
SFO1 100.6255806 MHz  
NUC1 13C  
P0 2.67 usec  
P1 8.00 usec  
PLW1 93.98000336 W  
SFO2 400.3016012 MHz  
NUC2 1H  
CPDPRG2 waltz65  
PCPD2 90.00 usec  
PLW2 24.35899925 W  
PLW12 0.19247000 W  
PLW13 0.09681000 W

F2 - Processing parameters  
SI 32768  
SF 100.62555151 MHz  
WDW EM  
SSB 0  
LB 1.00 Hz  
GB 0  
PC 1.40

Fig.S3. <sup>13</sup>C NMR spectrum of OX(PID)<sub>2</sub>

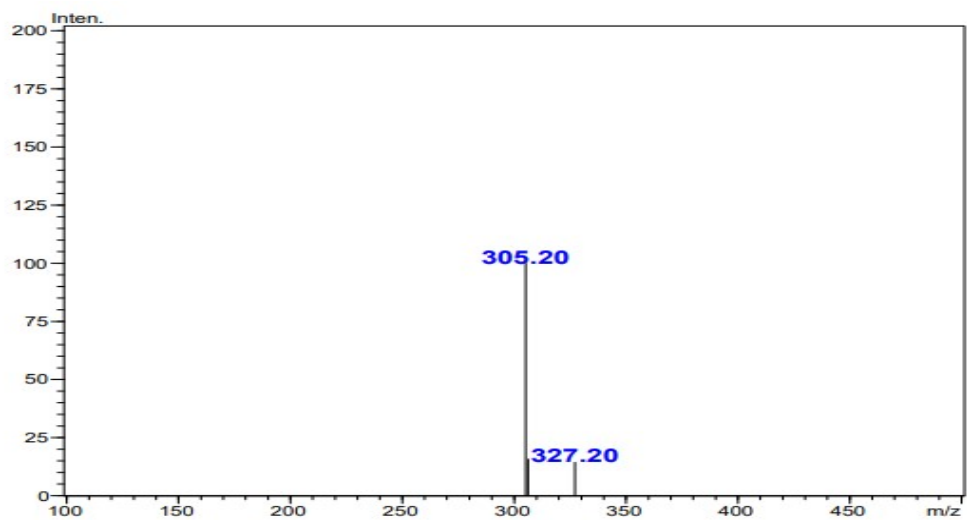

**Fig.S4.** ESI-Mass spectral data for OX(PID)<sub>2</sub>

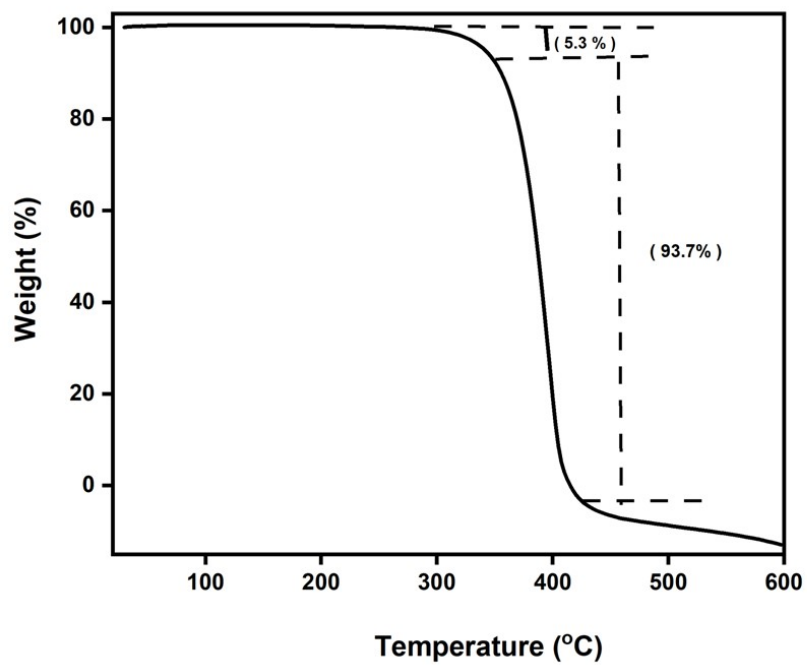

Fig.S5. TGA spectral data for OX(PID)<sub>2</sub>

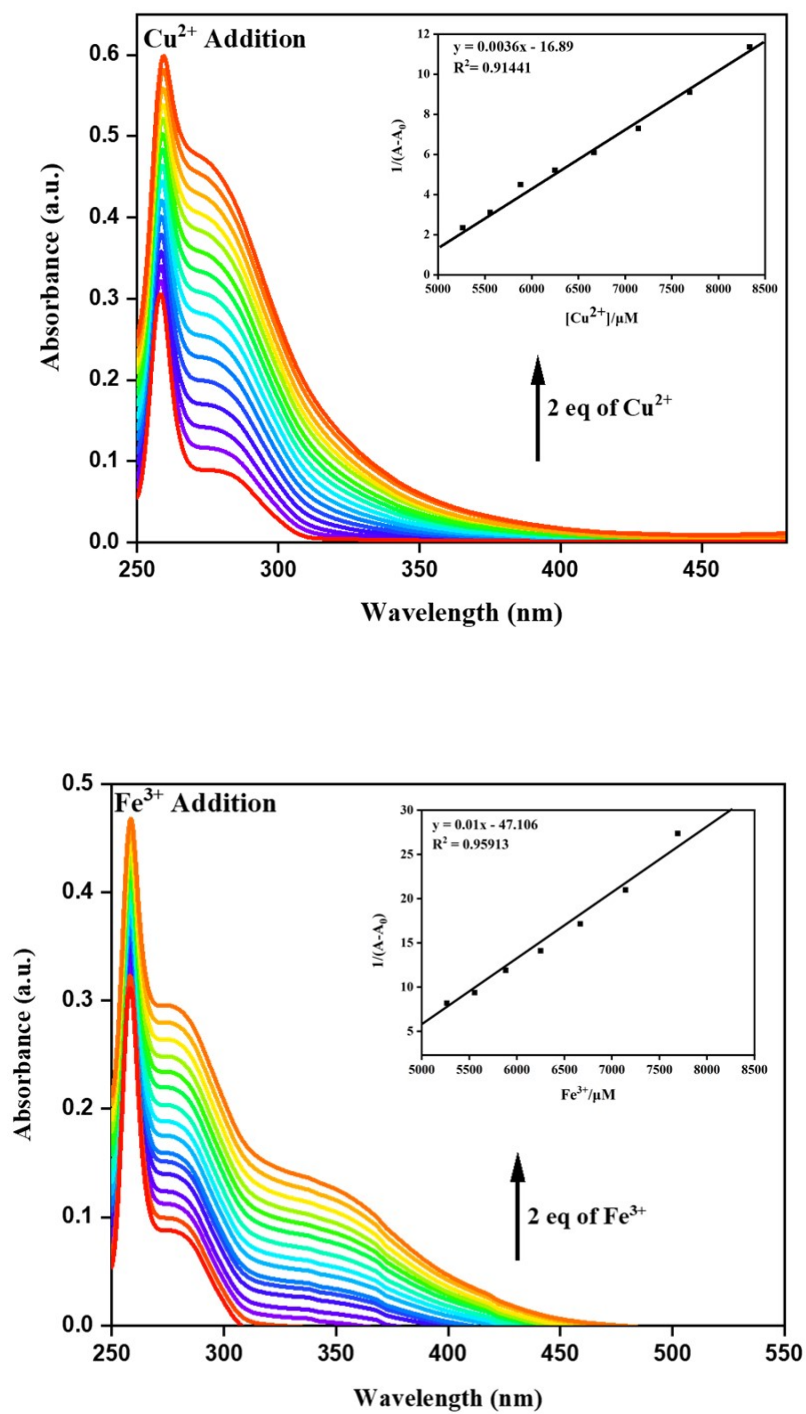

**Fig. S6.** UV-Vis absorption spectral changes of receptor OX(PID)<sub>2</sub> upon addition of various concentrations of (2 eq of Fe<sup>3+</sup> and Cu<sup>2+</sup>) ions (2-20 μM).

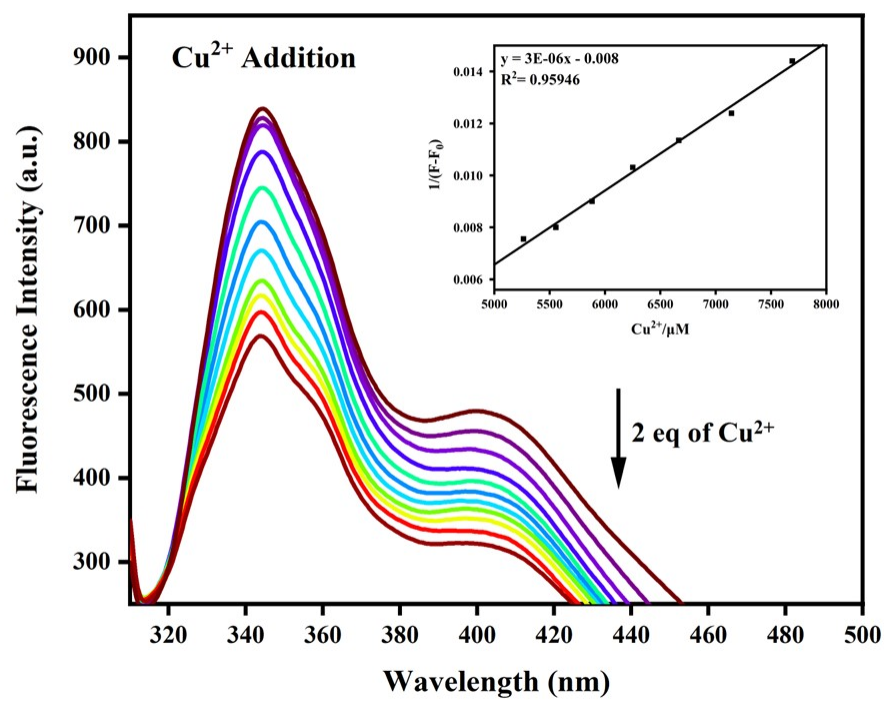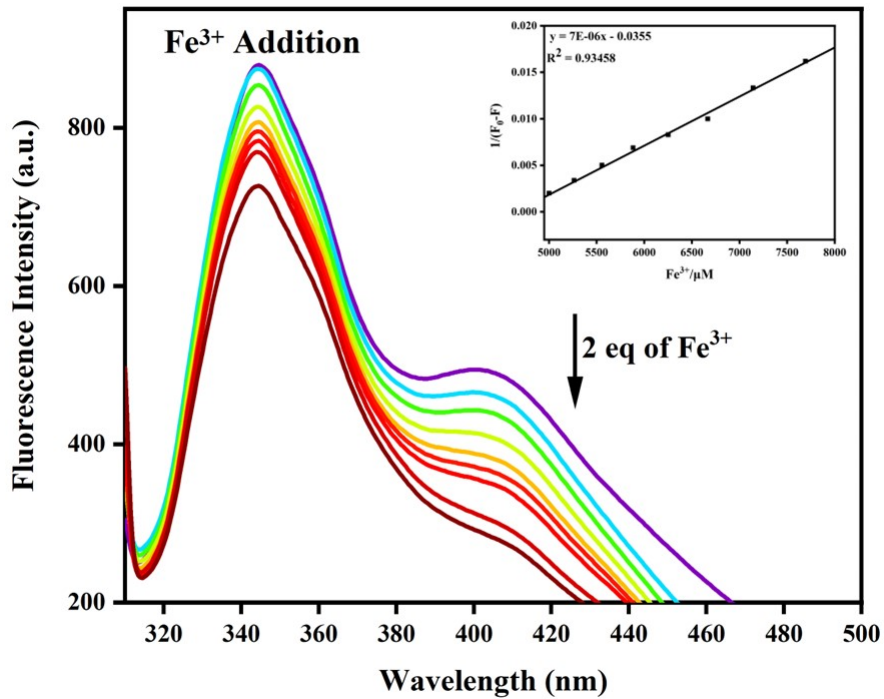

**Fig.S7.** Fluorescence emission spectra of receptor OX(PID)<sub>2</sub> with increasing concentration of Cu<sup>2+</sup> and Fe<sup>3+</sup> (2–20 μM) in DMSO.

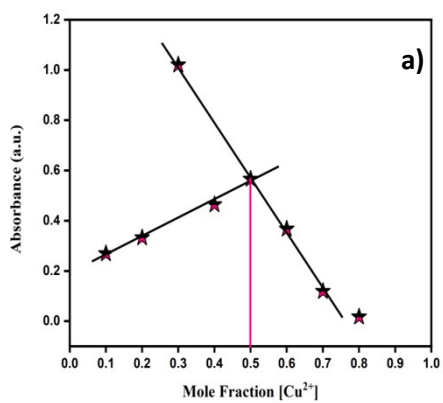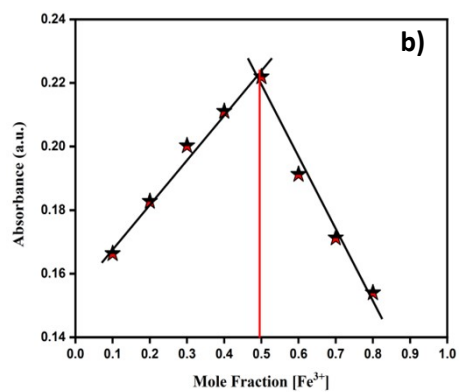

**Fig.S8. (a)** Job's plot analysis for OX(PID)<sub>2</sub> with Cu<sup>2+</sup> **(b)** Job's plot analysis for OX(PID)<sub>2</sub> with Fe<sup>3+</sup> ion



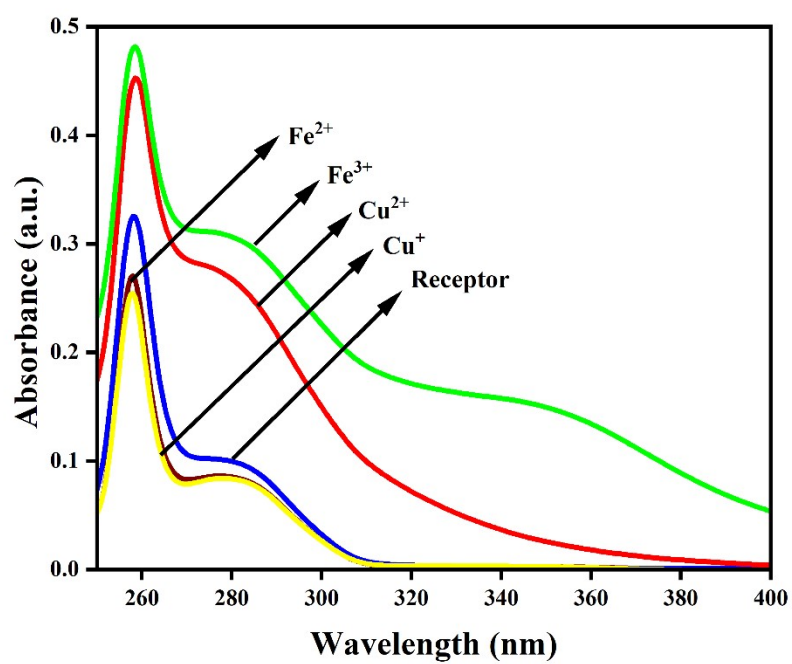

**Fig. S9.** UV-Vis absorption spectral changes of receptor OX(PID)<sub>2</sub> upon addition of 2 eq of Fe<sup>3+</sup>, Fe<sup>2+</sup>, and Cu<sup>+</sup>, Cu<sup>2+</sup> ions (20 μM).

Table S1. Comparative binding constants and LODs of oxalamide-based compound

| Oxalamide & Imidazole based receptors                                               | Sensing analyte  | Binding constant (M <sup>-1</sup> ) | The detection limit (μM) | References |
|-------------------------------------------------------------------------------------|------------------|-------------------------------------|--------------------------|------------|
| 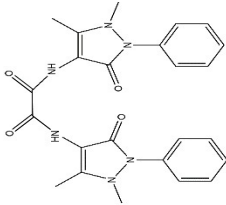   | Cu <sup>2+</sup> | 2.63 × 10 <sup>3</sup>              | 0.42                     | 31         |
|    | Zn <sup>2+</sup> | 2.5 × 10 <sup>5</sup>               | 0.02                     | 32         |
|   | Fe <sup>2+</sup> | 1.4 × 10 <sup>4</sup>               | 0.32                     | 33         |
|                                                                                     | Fe <sup>3+</sup> | 2.8 × 10 <sup>4</sup>               | 0.27                     |            |
|  | Cu <sup>2+</sup> | 3.3 × 10 <sup>2</sup>               | 0.91                     | 34         |
|                                                                                     | Zn <sup>2+</sup> | 4.5 × 10 <sup>3</sup>               | 11.9                     |            |
|  | Zn <sup>2+</sup> | 1.5 × 10 <sup>4</sup>               | 2.4                      | 35         |
|  | Cu <sup>2+</sup> | 2.58 × 10 <sup>3</sup>              | 0.1                      | This work  |
|                                                                                     | Fe <sup>3+</sup> | 7.15 × 10 <sup>2</sup>              | 0.9                      |            |

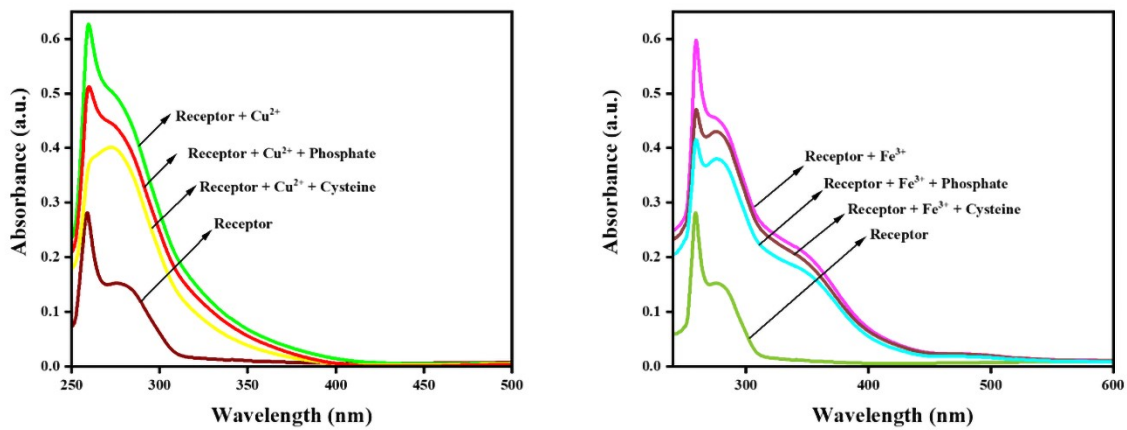

Fig. (S10, S11). Reversibility study for Receptor OX(PID)<sub>2</sub>, Cu<sup>2+</sup>, and Fe<sup>3+</sup> with Cysteine/Phosphate

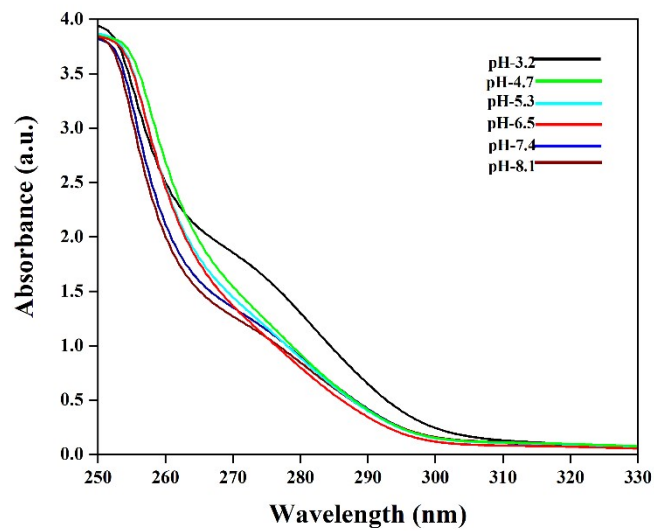

Fig.S12. Effects of pH on the absorbance spectral data of receptor OX(PID)<sub>2</sub> with different pH solutions.

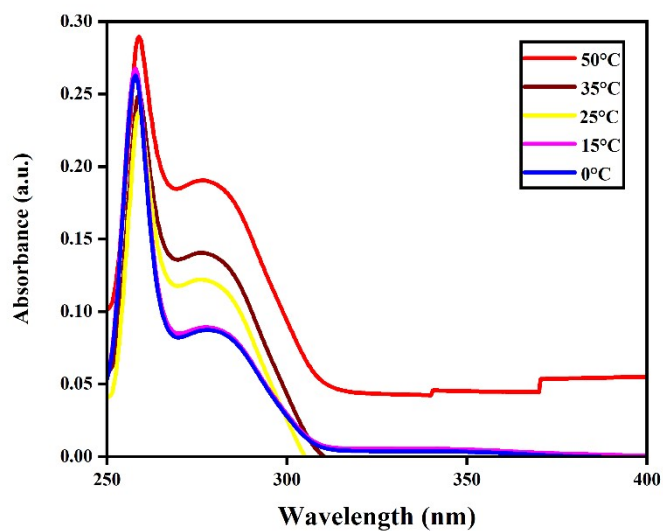

Fig.S13. Effects of temperature on the absorbance spectral data of receptor OX(PID)<sub>2</sub>

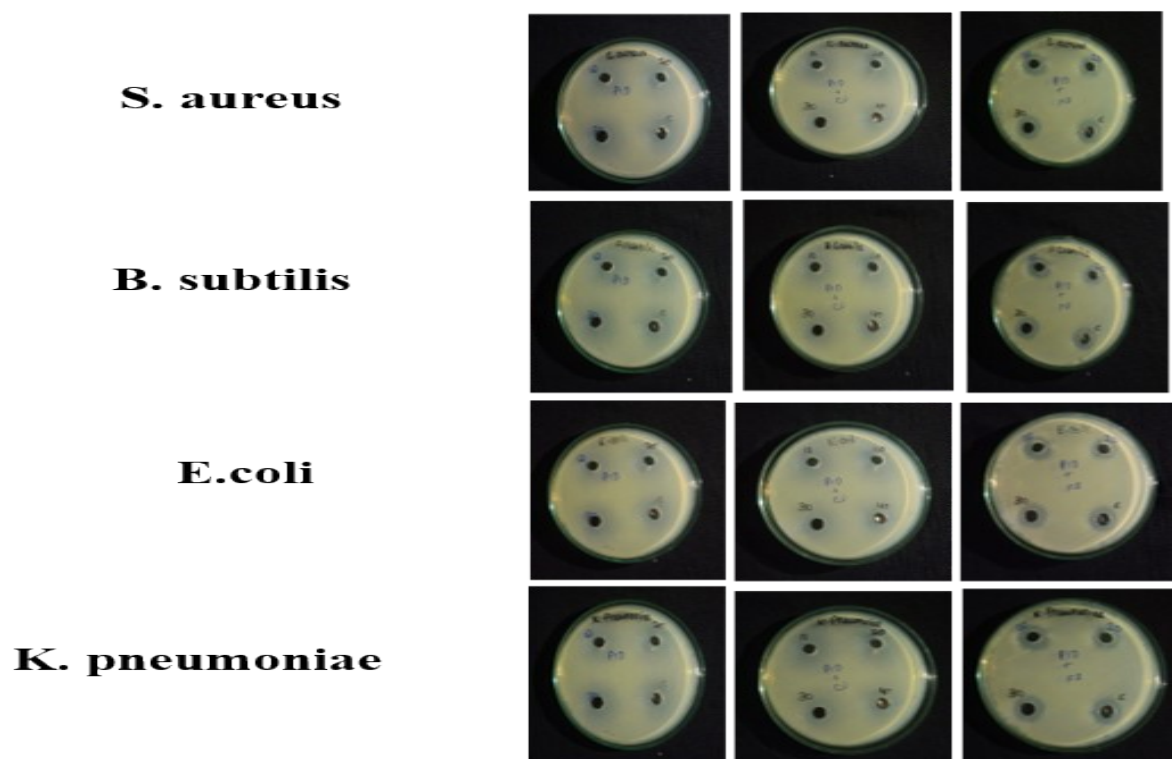

**Fig. S14.** Antibacterial activities of various concentrations of OX(PID)<sub>2</sub>, OX(PID)<sub>2</sub> + Cu<sup>2+</sup>, and OX(PID)<sub>2</sub> + Fe<sup>3+</sup> against *S. aureus*, *B. subtilis*, *E. coli*, and *K. pneumoniae*.

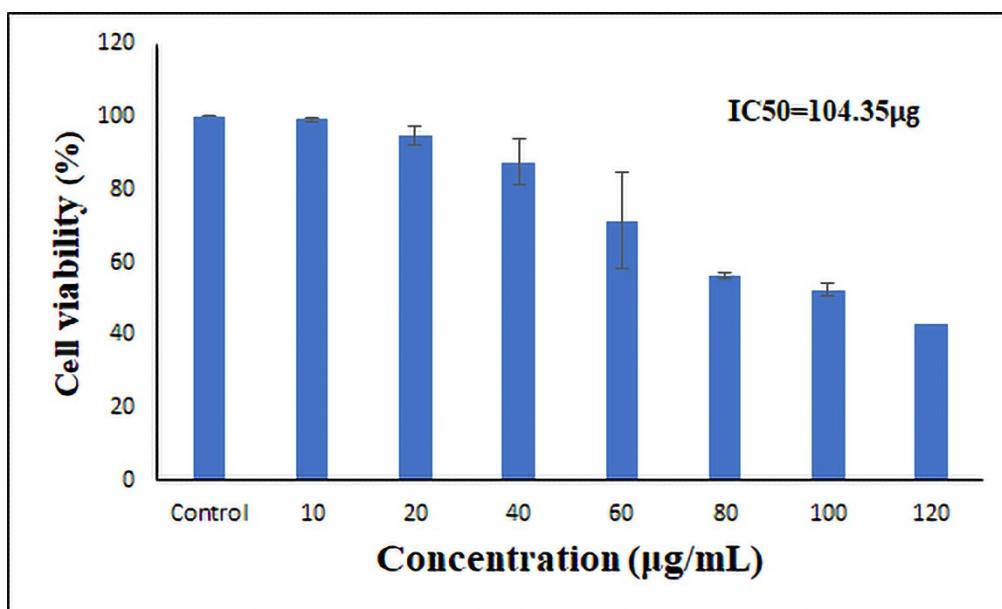

Fig. S15. Cytotoxicity MTT assay for Receptor OX(PID)<sub>2</sub> with MDA-MB-231 cells
